# Supplementary material for: Estrogen negatively regulates the renal epithelial sodium channel (ENaC) by promoting Derlin-1 expression and AMPK activation
Source: PubMed Central journal article supplement (PMC6529463; doi:10.1038/s12276-019-0253-z), 2019-05-21

## Supplemental Figure Legend

### Supplementary Figure 1: Effect of Estrogen on $\alpha$ -ENaC and derlin-1 mRNA expressions.

The mRNA expressions of  $\alpha$ -ENaC (A) and derlin-1 (C) was determined in mpkCCDc14 cells treated with 0.1, 0.5, 1, 10, 100  $\mu$ M E<sub>2</sub> by real-time PCR. The mRNA expressions of  $\alpha$ -ENaC (B) and derlin-1 (D) were also examined as a function of time during the stimulation of mpkCCDc14 cells with 100  $\mu$ M E<sub>2</sub> by real-time PCR. Bars are means  $\pm$  SE from three independent experiments, \* $P < 0.05$ , \*\* $P < 0.01$  compared to Con.

### Supplementary Figure 1

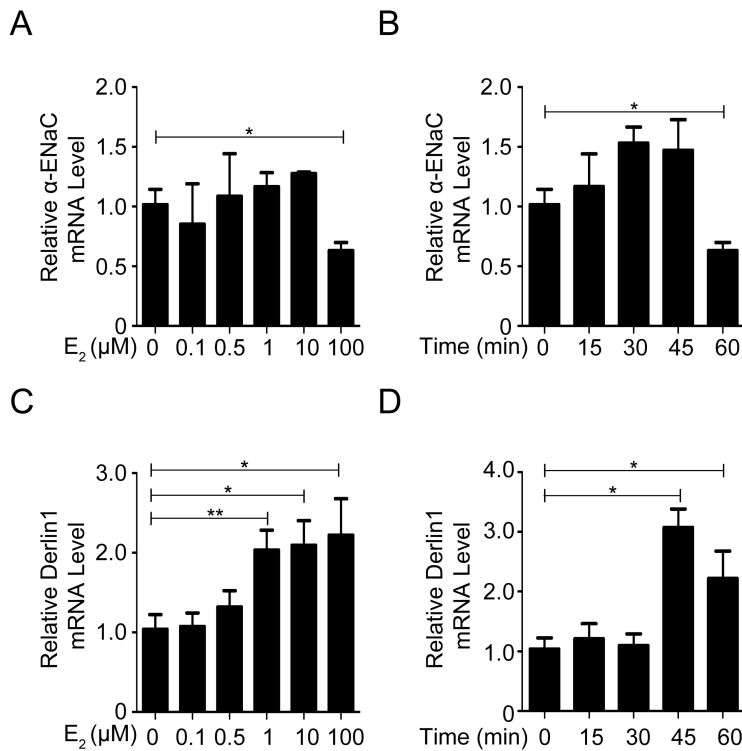

Supplement: 12276_2019_253_MOESM1_ESM.pdf [file 12276_2019_253_MOESM1_ESM.pdf]
